# Supplementary material for: Structural modification of thieno[3,4-c]pyrrole-4,6-dione: structure–property relationships and application in solution-processed small-molecule organic solar cells
Source: Royal Society of Chemistry journal article supplement (doi:10.1039/c3ta10471k), 2013-01-01
Supplement: c3ta10471k.pdf [file c3ta10471k.pdf]

# Structural Modification of Thieno[3,4-*c*]-pyrrole-4,6-dione: Structure-Property Relationships and Application in Solution-Processed Small-Molecule Organic Solar Cells

*Hong-Yu Wang,<sup>[a]\*</sup> Jun Gao,<sup>[a]</sup> Ling-Jie Gu,<sup>[a]</sup> Jun-Hua Wan,<sup>[b]</sup> Wei Wei,<sup>[c]</sup> Feng  
Liu<sup>[d]\*</sup>*

<sup>[a]</sup> Department of Chemistry, Shanghai University, Shanghai 200444, China

<sup>[b]</sup> Key Laboratory of Organosilicon Chemistry and Material Technology of Ministry of Education, Hangzhou Normal University, Hangzhou 310012, China

<sup>[c]</sup> Institute of Advanced Materials, Nanjing University of Posts and Telecommunications, Nanjing 210046, China

<sup>[d]</sup> Department of Polymer Science and Engineering, University of Massachusetts Amherst, Massachusetts 01003, USA

Supporting information.

Figure S1. <sup>1</sup>H NMR spectrum of **3TTIN3T**

Figure S2. <sup>13</sup>C NMR spectrum of **3TTIN3T**

Figure S3. MS (MALDI-TOF) spectrum of **3TTIN3T**

Figure S4. <sup>1</sup>H NMR spectrum of **3TTPD3T**

Figure S5. <sup>13</sup>C NMR spectrum of **3TTPD3T**

Figure S6. MS (MALDI-TOF) spectrum of **3TTPD3T**

Figure S7. <sup>1</sup>H NMR spectrum of **3TTPN3T**

Figure S8. <sup>13</sup>C NMR spectrum of **3TTPN3T**

Figure S9. MS (MALDI-TOF) spectrum of **3TTPN3T**

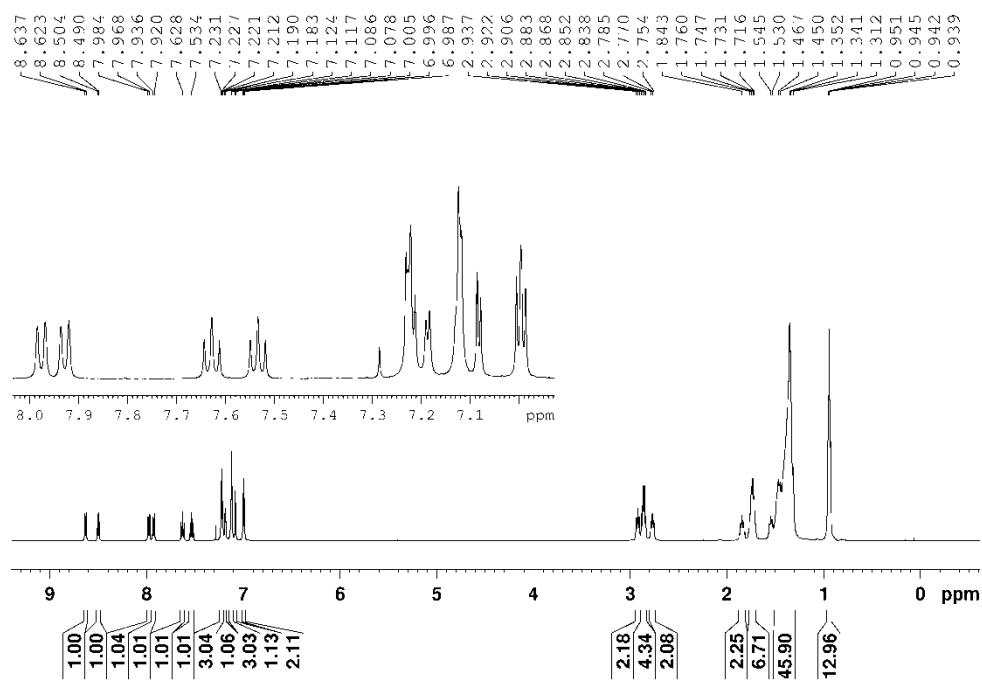

Figure S1. <sup>1</sup>H NMR spectrum of 3TTIN3T

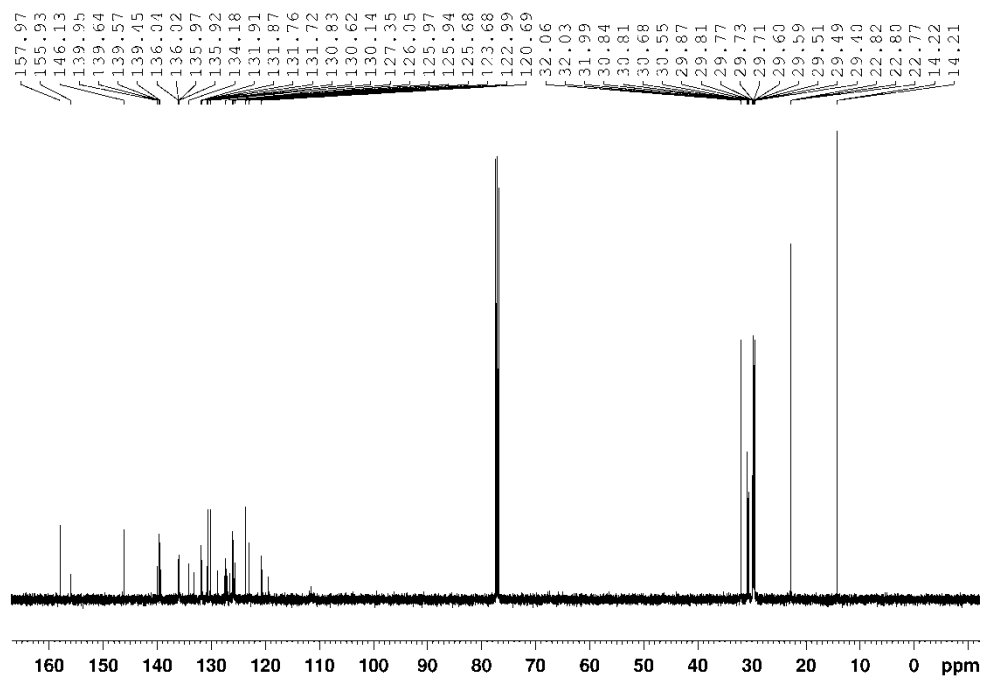

Figure S2. <sup>13</sup>C NMR spectrum of 3TTIN3T

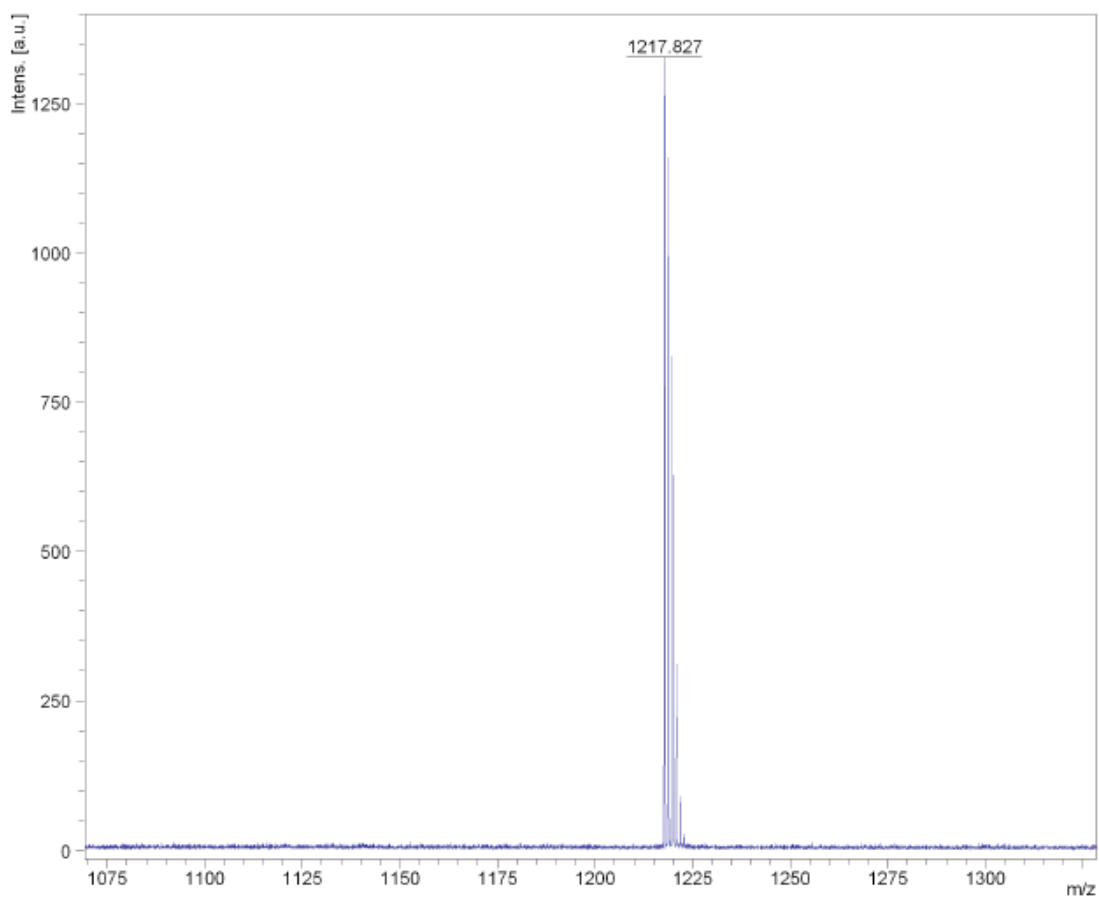

Figure S3. MS (MALDI-TOF) spectrum of **3TTIN3T**

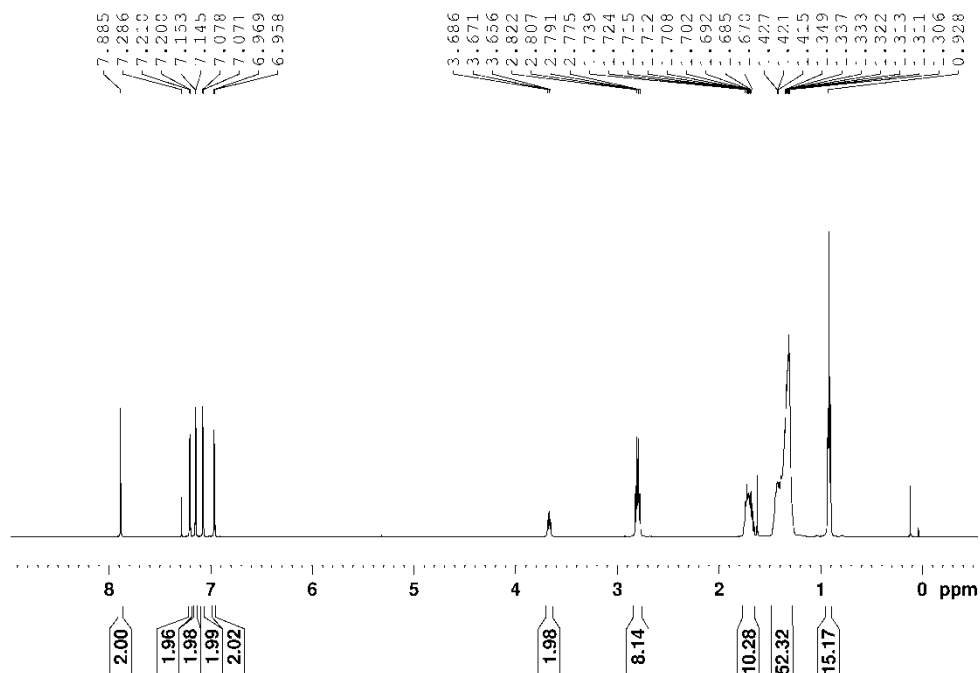

Figure S4. <sup>1</sup>H NMR spectrum of **3TTPD3T**

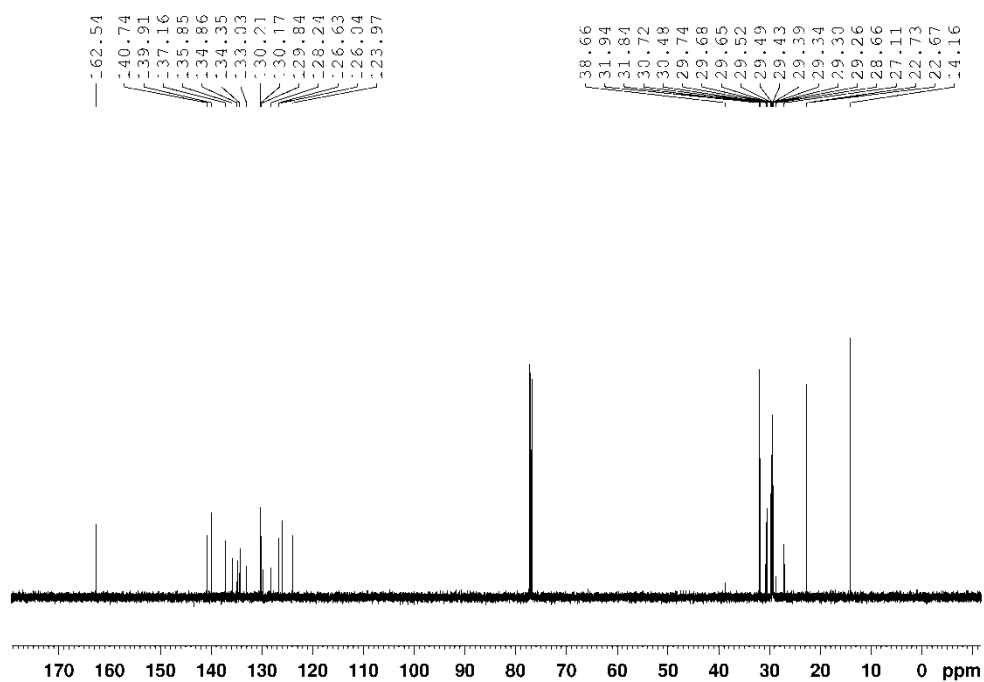

Figure S5.  $^{13}\text{C}$  NMR spectrum of 3TTPD3T

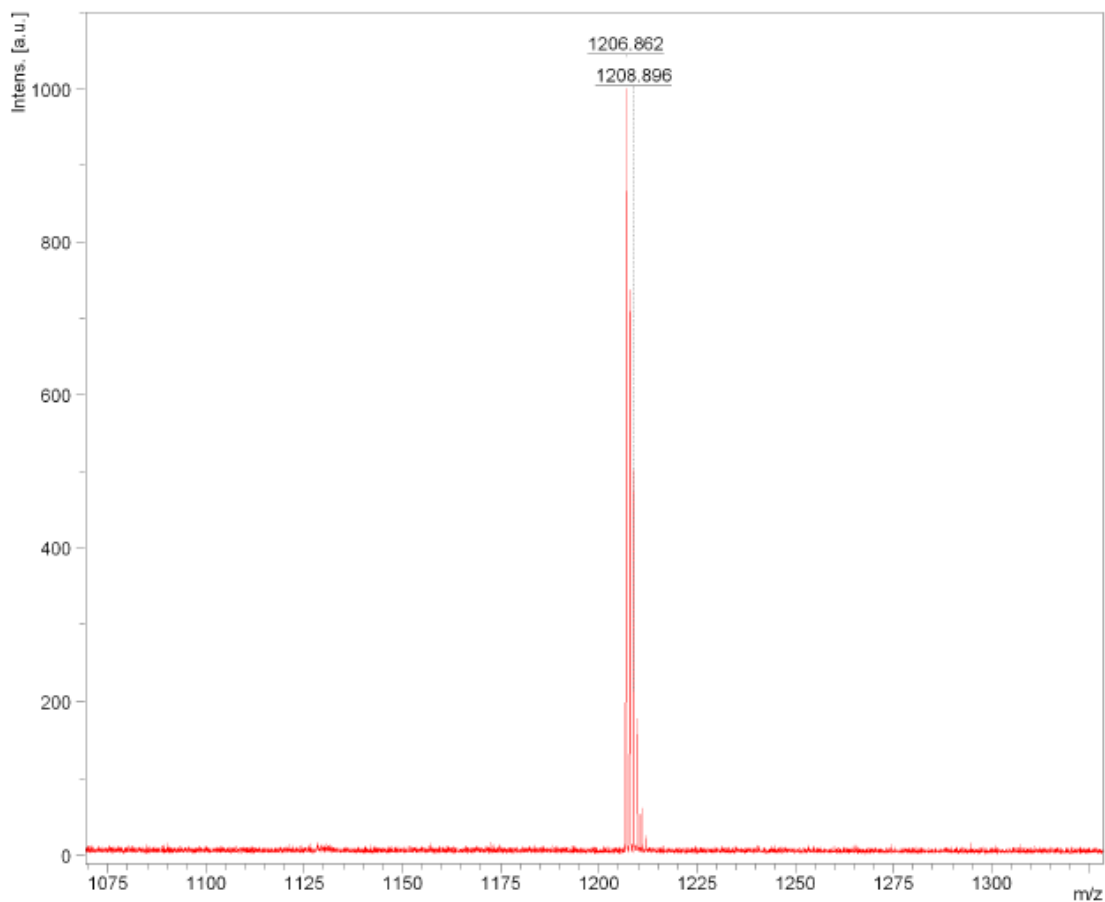

Figure S6. MS (MALDI-TOF) spectrum of 3TTPD3T

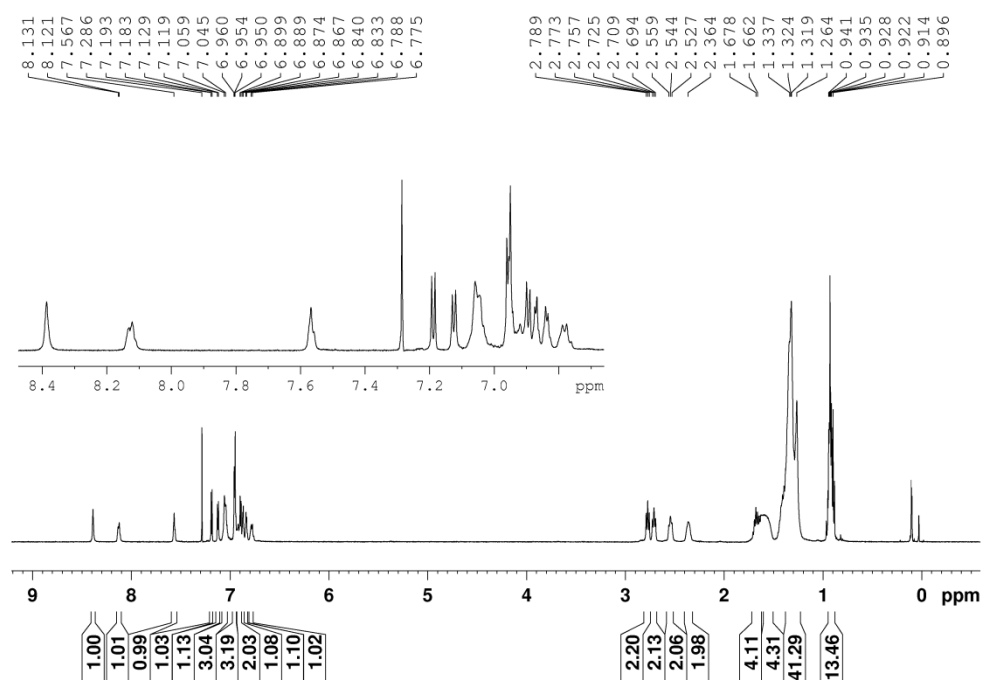

Figure S7.  $^1\text{H}$  NMR spectrum of 3TTPN3T

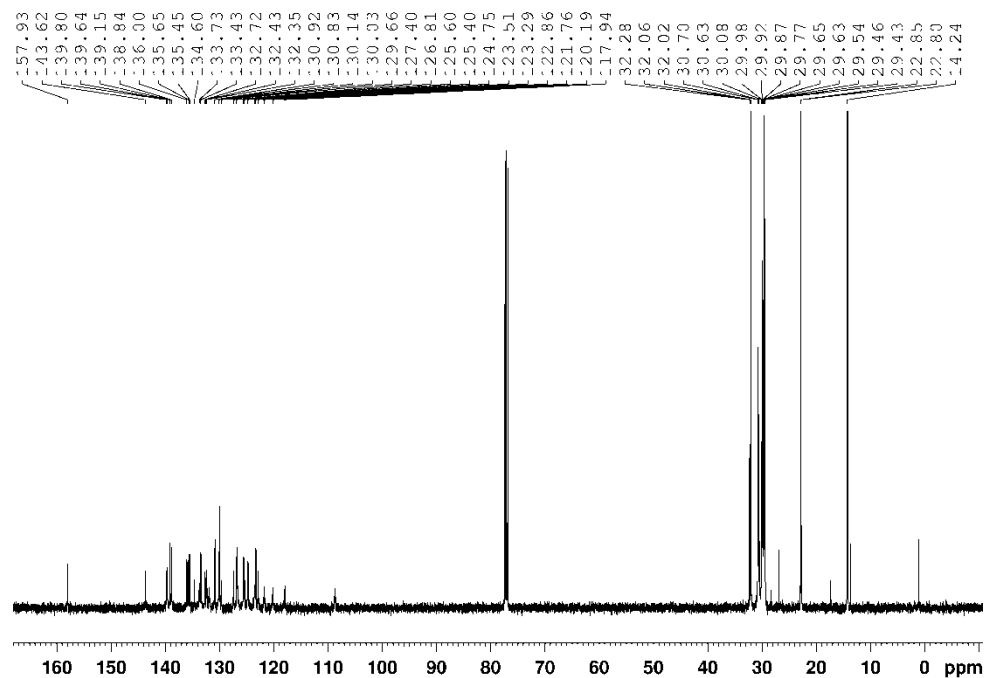

Figure S8.  $^{13}\text{C}$  NMR spectrum of 3TTPN3T

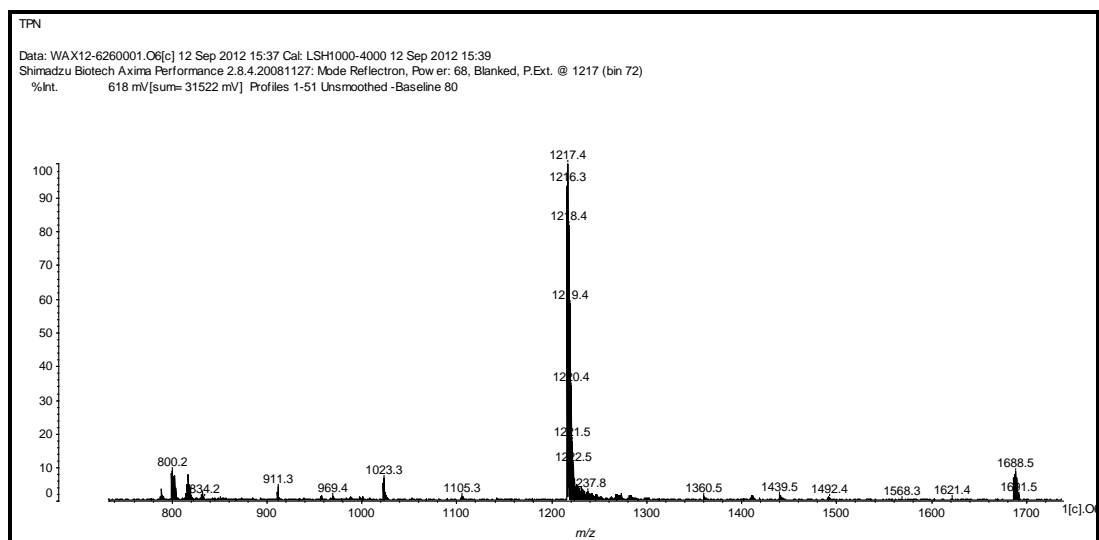

Figure S9. MS (MALDI-TOF) spectrum of 3TTPN3T
